# Supplementary material for: Thirty-Year Prediction of 137Cs Supply from Rivers to Coastal Waters off Fukushima Considering Human Activities
Source: MDPI journal article supplement (doi:10.3390/w15152734), 2023-07-28
Supplement: s1 [file s1]

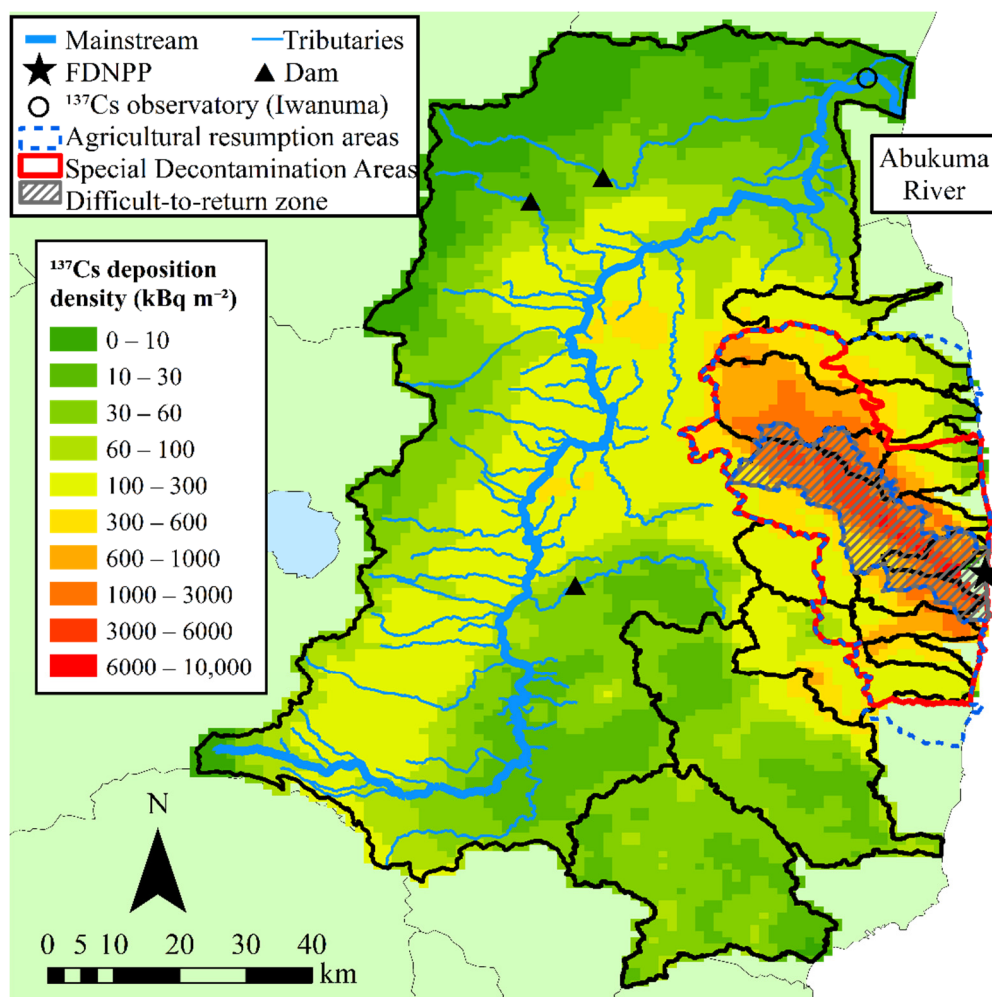

**Figure S1.** Outline of the computational domain in the Abukuma River basin. This figure was created using ArcGIS Desktop 10.6.1.

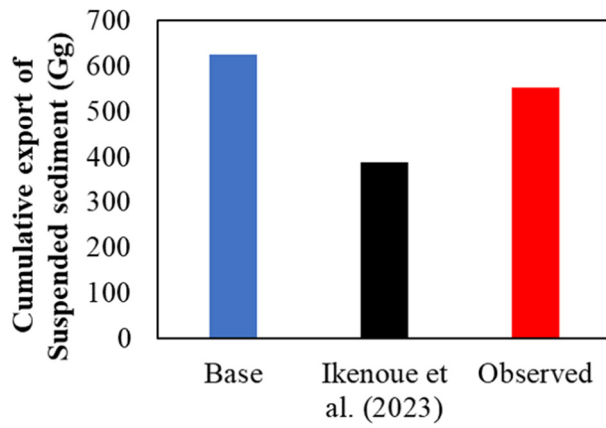

(a)

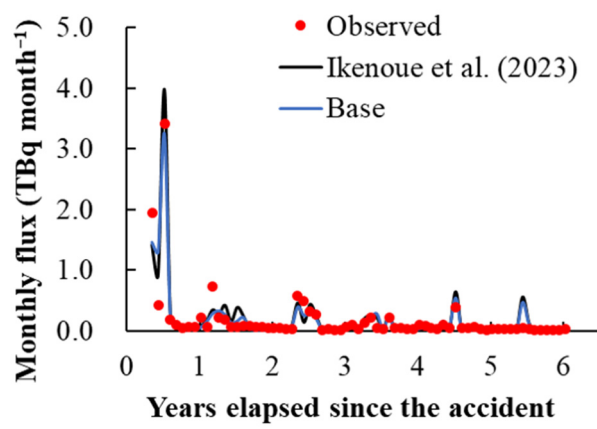

(b)

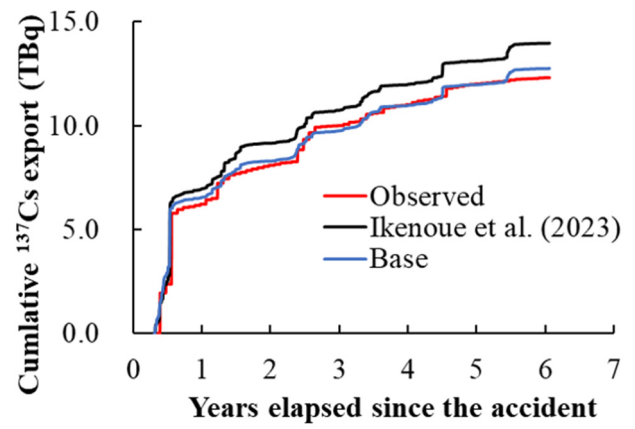

(c)

**Figure S2.** Model validation results in the Abukuma River basin. (a) Cumulative export of suspended sediment at the Iwanuma observatory from August 10, 2011, to May 11, 2012 based on observation [24] and the calculation using the model in Ikenoue et al. [15] and this study. (b) Monthly and (c) cumulative exports of  $^{137}\text{Cs}$  at the Iwanuma observatory based on observation [12,13] and the calculation using the model in Ikenoue et al. [15] and this study.
